# Supplementary material for: Exploratory Assessment to Evaluate Seed Sprouting under Elevated CO2 Revealed Improved Biomass, Physiology, and Nutritional Value of Trachyspermum ammi
Source: MDPI journal article supplement (doi:10.3390/agronomy11050830), 2021-04-23
Supplement: s1 [file s1]

**Table S1.** Results of a pot experiment to test the effect of elevated CO<sub>2</sub> (eCO<sub>2</sub>) treatment versus ambient CO<sub>2</sub> (control) on fresh weight, dry weight, photosynthesis and respiration of *Trachyspermum ammi* sprouts. Data are represented by means  $\pm$  standard deviations of at least 3 replicates. Different a, b, c letters within a row indicate a significant difference between means at  $p < 0.05$ .

| Parameters                                                            | Control-sprouts  | eCO <sub>2</sub> -sprouts |
|-----------------------------------------------------------------------|------------------|---------------------------|
| Fresh weight (g)                                                      | 7.4 $\pm$ 0.3a   | 9.4 $\pm$ 1.0a            |
| Dry weight (g)                                                        | 1.0 $\pm$ 0.5a   | 1.89 $\pm$ 0.3b           |
| Photosynthesis ( $\mu\text{mol CO}_2 \text{ m}^{-2} \text{ S}^{-1}$ ) | 16.1 $\pm$ 0.4a  | 20.1 $\pm$ 0.8b           |
| Respiration ( $\mu\text{mol CO}_2 \text{ m}^{-2} \text{ S}^{-1}$ )    | 0.11 $\pm$ 0.02a | 0.13 $\pm$ 0.01a          |

**Table S2.** Sum of Squares, Degrees of freedom (df), *F*-values, *P*-values, and mean squares generated from analysis of variance of seed, control sprouts and elevated CO<sub>2</sub> treated sprouts

|                                            | Sum of Squares | df | Mean Square | F value  | P value |
|--------------------------------------------|----------------|----|-------------|----------|---------|
| Fresh weight                               | 1.815          | 1  | 1.815       | 1.558    | 0.28    |
| Dry weight                                 | 1.297          | 1  | 1.297       | 32.434   | 0.005   |
| Photosynthesis                             | 21.66          | 1  | 21.66       | 27.075   | 0.007   |
| Respiration                                | 0.001          | 1  | 0.001       | 6        | 0.07    |
| Antioxidant (FRAP)                         | 421            | 2  | 210.726     | 76.604   | <0.0001 |
| Antioxidant (ORAC)                         | 141594         | 2  | 70797.17    | 31.31    | 0.001   |
| Antioxidant (TBARS)                        | 333            | 2  | 166.69      | 48.787   | <0.0001 |
| Anti-cancer (HepG2)                        | 661            | 2  | 330.501     | 14.829   | 0.005   |
| Anti-cancer (Colo205)                      | 1288           | 2  | 643.872     | 38.756   | <0.0001 |
| Anti-cancer (293)                          | 785            | 2  | 392.537     | 8.774    | 0.017   |
| Anti-Cancer (T24P)                         | 1042           | 2  | 520.796     | 46.358   | <0.0001 |
| Anti-microbial ( <i>S. saprophyticus</i> ) | 202            | 2  | 100.798     | 589.936  | <0.0001 |
| Anti-microbial ( <i>S. epidermidis</i> )   | 446            | 2  | 222.956     | 53486.70 | <0.0001 |
| Anti-microbial ( <i>E. faecalis</i> )      | 175            | 2  | 87.336      | 99.521   | <0.0001 |
| Anti-microbial ( <i>S. salivarius</i> )    | 143            | 2  | 71.514      | 686.536  | <0.0001 |
| Anti-microbial ( <i>E. coli</i> )          | 77             | 2  | 38.536      | 112.783  | <0.0001 |
| Anti-microbial ( <i>S. typhimurium</i> )   | 17             | 2  | 8.48        | 481.797  | <0.0001 |
| Anti-microbial ( <i>P. aeruginosa</i> )    | 290            | 2  | 145.119     | 866.37   | <0.0001 |
| Anti-microbial ( <i>P. vulgaris</i> )      | 533            | 2  | 266.342     | 971.332  | <0.0001 |
| Anti-microbial ( <i>E. aerogenes</i> )     | 227            | 2  | 113.542     | 150.056  | <0.0001 |
| Anti-microbial ( <i>S. marcescens</i> )    | 0.02           | 2  | 0.01        | 0.062    | 0.94    |
| Anti-microbial ( <i>C. albicans</i> )      | 28             | 2  | 13.949      | 463.617  | <0.0001 |
| Anti-microbial ( <i>C. glabrata</i> )      | 24             | 2  | 12.114      | 210.07   | <0.0001 |
| Anti-microbial ( <i>A. flavus</i> )        | 370            | 2  | 184.831     | 197.294  | <0.0001 |
| Sugar (Glucose)                            | 0.11           | 2  | 0.054       | 1.728    | 0.256   |
| Sugar (Fructose)                           | 0.04           | 2  | 0.018       | 4.242    | 0.071   |
| Sugar (Sucrose)                            | 0.76           | 2  | 0.381       | 105.279  | <0.0001 |
| Sugar (Soluble sugars)                     | 9.28           | 2  | 4.641       | 607.092  | <0.0001 |
| Sugar (Starch)                             | 432            | 2  | 215.905     | 451.895  | <0.0001 |
| Sugar (Total Carbohydrates)                | 763            | 2  | 381.25      | 222.519  | <0.0001 |
| Amino acids (Lysine)                       | 2.07           | 2  | 1.034       | 232.75   | <0.0001 |
| Amino acids (Histidine)                    | 0.17           | 2  | 0.084       | 76       | <0.0001 |
| Amino acids (Alanine)                      | 97             | 2  | 48.61       | 137.575  | <0.0001 |
| Amino acids (Arginine)                     | 5.04           | 2  | 2.52        | 378      | <0.0001 |
| Amino acids (Isoleucine)                   | 0.03           | 2  | 0.015       | 17.123   | 0.003   |
| Amino acids (Asparagine)                   | 0.18           | 2  | 0.09        | 143.754  | <0.0001 |
| Amino acids (Ornithine)                    | 0.05           | 2  | 0.027       | 271      | <0.0001 |
| Amino acids (Glycine)                      | 0.11           | 2  | 0.054       | 49       | <0.0001 |
| Amino acids (Phenylalanine)                | 0.08           | 2  | 0.041       | 12.25    | 0.008   |

|                                         |       |   |        |          |         |
|-----------------------------------------|-------|---|--------|----------|---------|
| Amino acids (Serine)                    | 1.58  | 2 | 0.79   | 26.333   | 0.001   |
| Amino acids (Proline)                   | 0.02  | 2 | 0.01   | 0.3      | 0.751   |
| Amino acids (Valine)                    | 0.43  | 2 | 0.217  | 1502.846 | <0.0001 |
| Amino acids (Aspartate)                 | 0.95  | 2 | 0.474  | 1705.72  | <0.0001 |
| Amino acids (Cystine)                   | 1.13  | 2 | 0.567  | 1593.37  | <0.0001 |
| Amino acids (Leucine)                   | 0.02  | 2 | 0.007  | 48.384   | <0.0001 |
| Amino acids (Methionine)                | 0.00  | 2 | 0      | 0.269    | 0.773   |
| Amino acids (Threonine)                 | 0.01  | 2 | 0.002  | 1.981    | 0.218   |
| Amino acids (Tyrosine)                  | 0.02  | 2 | 0.01   | 3.693    | <0.0001 |
| Amino acids (Glutamine)                 | 598   | 2 | 299.19 | 88.344   | <0.0001 |
| Amino acids (Glutamic acid)             | 702   | 2 | 351    | 271.392  | <0.0001 |
| Organic acids (Oxalic acid)             | 0.02  | 2 | 0.01   | 0.097    | 0.909   |
| Organic acids (Malic acid)              | 2.49  | 2 | 1.244  | 10.354   | 0.011   |
| Organic acids (Isobutyric acid)         | 2.43  | 2 | 1.217  | 89.408   | <0.0001 |
| Organic acids (Fumaric acid)            | 0.01  | 2 | 0.003  | 0.123    | 0.886   |
| Organic acids (Succinic acid)           | 6.11  | 2 | 3.053  | 25.034   | 0.001   |
| Organic acids (Citric acid)             | 3.66  | 2 | 1.829  | 266.374  | <0.0001 |
| Essential oil ( $\alpha$ -piene)        | 0.14  | 2 | 0.068  | 20.435   | 0.002   |
| Essential oil ( $\alpha$ -Thujene)      | 24    | 2 | 12     | 171.429  | <0.0001 |
| Essential oil (Sabiene)                 | 0.26  | 2 | 0.13   | 0.382    | 0.698   |
| Essential oil (B-myrceme)               | 72.26 | 2 | 36.13  | 84.023   | <0.0001 |
| Essential oil (D-Limonene)              | 0.26  | 2 | 0.13   | 6.5      | 0.031   |
| Essential oil ( $\alpha$ -terpinene)    | 386   | 2 | 192.76 | 128.793  | <0.0001 |
| Essential oil (Cymene)                  | 90    | 2 | 44.89  | 14.997   | 0.005   |
| Essential oil ( $\alpha$ - terpinolene) | 18.96 | 2 | 9.48   | 53.66    | <0.0001 |
| Essential oil (Thymol)                  | 0.134 | 2 | 0.067  | 26.23    | 0.001   |
| Essential oil (Carvacol)                | 0.041 | 2 | 0.021  | 9.941    | 0.012   |
| Essential oil (alpha-thyhone)           | 0.034 | 2 | 0.017  | 4.031    | 0.078   |
| Essential oil (Tricyclene)              | 0.000 | 2 | 0      | 0.031    | 0.97    |
| Essential oil (beta-Phellandrene)       | 0.000 | 2 | 0      | 0.221    | 0.808   |
| Essential oil (Humuline)                | 0.000 | 2 | 0      | 0.054    | 0.948   |
| Phenolic (Gallic acid)                  | 0.232 | 2 | 0.116  | 306.559  | <0.0001 |
| Phenolic acid (Caffeic acid)            | 0.058 | 2 | 0.029  | 291.444  | <0.0001 |
| Phenolic acid (p-Coumaric acid)         | 2.020 | 2 | 1.01   | 8.905    | 0.016   |
| Phenolic acid (Chicoric acid)           | 0.513 | 2 | 0.257  | 11.393   | 0.009   |
| Phenolic acid (Rosmarinic acid)         | 0.854 | 2 | 0.427  | 8.967    | 0.016   |
| Phenolic acid (Protocatechuic acid)     | 0.698 | 2 | 0.349  | 5.411    | 0.045   |
| Flavonoid (Quercetin)                   | 0.02  | 2 | 0.007  | 40.476   | <0.0001 |
| Flavonoid (Naringenin)                  | 0.01  | 2 | 0.006  | 19.342   | 0.002   |
| Flavonoid (Kaempferol)                  | 0.00  | 2 | 0      | 0.029    | 0.971   |
| Flavonoid (Luteolin)                    | 0.000 | 2 | 0      | 0.31     | 0.745   |
| Flavonoid (Apigenin)                    | 0.017 | 2 | 0.009  | 71.273   | <0.0001 |
| Flavonoid (Naringenin)                  | 0.000 | 2 | 0      | 0        | 1       |

|                              |       |   |       |         |         |
|------------------------------|-------|---|-------|---------|---------|
| Flavonoid (Rutin)            | 0.000 | 2 | 0     | 0.509   | 0.625   |
| Flavonoid (Chlorogenic acid) | 0.000 | 2 | 0     | 0.299   | 0.752   |
| Total phenols                | 266   | 2 | 133   | 395.05  | <0.0001 |
| Total Flavonoids             | 6.4   | 2 | 3.191 | 872.884 | <0.0001 |

**Table S2.** Results of a pot experiment to test the effect of elevated CO<sub>2</sub> (eCO<sub>2</sub>) treatment versus ambient CO<sub>2</sub> (control) on fresh weight, dry weight, photosynthesis and respiration of *Trachyspermum ammi* sprouts. Data are represented by means  $\pm$  standard deviations of at least 3 replicates. Different a, b, c letters within a row indicate a significant difference between means at  $p < 0.05$ .

| Parameters                                                            | Control-sprouts  | eCO <sub>2</sub> -sprouts |
|-----------------------------------------------------------------------|------------------|---------------------------|
| Fresh weight (g)                                                      | 7.4 $\pm$ 0.3a   | 9.4 $\pm$ 1.0a            |
| Dry weight (g)                                                        | 1.0 $\pm$ 0.5a   | 1.89 $\pm$ 0.3b           |
| Photosynthesis ( $\mu\text{mol CO}_2 \text{ m}^{-2} \text{ S}^{-1}$ ) | 16.1 $\pm$ 0.4a  | 20.1 $\pm$ 0.8b           |
| Respiration ( $\mu\text{mol CO}_2 \text{ m}^{-2} \text{ S}^{-1}$ )    | 0.11 $\pm$ 0.02a | 0.13 $\pm$ 0.01a          |
